# Supplementary material
Source: PubMed Central journal article supplement (PMC7554085)
Supplement: NIHMS1601132-supplement-1.pdf [file NIHMS1601132-supplement-1.pdf]

## Supplementary data

**Supplementary Table S1. Baseline (1992 in the NHS and 1993 in the NHSII) characteristics of participants according to the first 4-year changes in healthful plant-based diet index (hPDI) and unhealthy plant-based diet index (uPDI)\***

|                                                | Decrease $\geq$ 10 pt | Decrease 3 to 9 pt | Relatively stable ( $\pm$ 2 pt) | Increase 3 to 9 pt | Increase $\geq$ 10 pt |
|------------------------------------------------|-----------------------|--------------------|---------------------------------|--------------------|-----------------------|
| <b>Healthful plant-based diet index (hPDI)</b> |                       |                    |                                 |                    |                       |
| <b>Nurses' Health Study</b>                    |                       |                    |                                 |                    |                       |
| <i>n</i>                                       | 4,365                 | 16,053             | 15,645                          | 11,826             | 2,401                 |
| hPDI score                                     |                       |                    |                                 |                    |                       |
| Baseline                                       | 61.8 (6.4)            | 58.0 (6.9)         | 55.2 (6.9)                      | 52.7 (6.8)         | 49.6 (6.6)            |
| Change                                         | -12.4 (2.4)           | -5.5 (1.9)         | -0.1 (1.4)                      | 5.3 (1.9)          | 12.2 (2.0)            |
| Age (year) <sup>†</sup>                        | 59 (7)                | 59 (7)             | 58 (7)                          | 57 (7)             | 57 (7)                |
| Body-mass index                                | 26.7 (5.1)            | 26.0 (4.9)         | 25.8 (4.8)                      | 25.8 (4.9)         | 26.0 (5.1)            |
| Physical activity (Met-hours/week)             | 19.2 (23.2)           | 19.9 (22.7)        | 19.8 (22.4)                     | 19.8 (23.8)        | 19.8 (22.2)           |
| Alcohol intake (g/day)                         | 4.7 (9.4)             | 5.1 (9.3)          | 5.2 (9.3)                       | 5.4 (9.9)          | 5.4 (9.8)             |
| Margarine Intake (servings/day)                | 0.9 (1.0)             | 0.9 (1.0)          | 0.9 (1.0)                       | 0.9 (1.0)          | 0.9 (1.0)             |
| Energy Intake (kcal/day)                       | 1647 (474)            | 1723 (503)         | 1758 (507)                      | 1805 (512)         | 1865 (499)            |
| White race (%)                                 | 98                    | 98                 | 98                              | 98                 | 98                    |
| Current Smoker (%)                             | 12                    | 12                 | 13                              | 12                 | 13                    |
| Premenopausal (%)                              | 21                    | 21                 | 21                              | 22                 | 23                    |
| Postmenopausal hormone use (%)                 | 34                    | 32                 | 32                              | 31                 | 29                    |
| Comorbidities (%)                              |                       |                    |                                 |                    |                       |
| Cardiovascular disease                         | 9                     | 8                  | 8                               | 8                  | 8                     |
| Cancer                                         | 9                     | 9                  | 9                               | 9                  | 8                     |
| Diabetes                                       | 4                     | 4                  | 4                               | 5                  | 6                     |
| Hypertension                                   | 36                    | 32                 | 32                              | 32                 | 32                    |
| Hypercholesterolemia                           | 51                    | 47                 | 45                              | 45                 | 46                    |
| Respiratory diseases                           | 12                    | 11                 | 11                              | 11                 | 12                    |
| NSAIDs use (%)                                 | 48                    | 50                 | 49                              | 49                 | 48                    |
| Multivitamin use (%)                           | 44                    | 43                 | 43                              | 42                 | 44                    |
| Social status (%)                              |                       |                    |                                 |                    |                       |
| Currently married                              | 82                    | 83                 | 84                              | 83                 | 80                    |
| Currently working                              | 90                    | 91                 | 90                              | 90                 | 89                    |
| Education (more than Bachelor)                 | 30                    | 31                 | 31                              | 31                 | 31                    |
| Husband Education (more than college)          | 46                    | 46                 | 48                              | 47                 | 45                    |
| Baseline SF-36 scores                          |                       |                    |                                 |                    |                       |
| Physical component score                       | 49.6 (9.1)            | 50.2 (8.8)         | 50.3 (8.7)                      | 50.3 (8.8)         | 50.3 (8.8)            |
| Mental component score                         | 52.0 (8.6)            | 52.1 (8.5)         | 52.4 (8.3)                      | 52.1 (8.4)         | 51.9 (8.6)            |

## Supplementary data

|                                    | Decrease $\geq$ 10 pt | Decrease 3 to 9 pt | Relatively stable ( $\pm$ 2 pt) | Increase 3 to 9 pt | Increase $\geq$ 10 pt |
|------------------------------------|-----------------------|--------------------|---------------------------------|--------------------|-----------------------|
| Physical functioning               | 85.1 (17.8)           | 86.3 (17.1)        | 86.4 (17.1)                     | 86.5 (17.0)        | 86.4 (17.1)           |
| Physical role limitations          | 74.9 (35.8)           | 76.3 (35.0)        | 76.7 (34.8)                     | 76.5 (35.1)        | 76.4 (35.1)           |
| Bodily pain                        | 73.0 (20.5)           | 74.3 (20.2)        | 74.8 (19.8)                     | 74.6 (20.1)        | 74.4 (20.3)           |
| General health                     | 79.0 (18.4)           | 80.2 (17.3)        | 80.4 (17.3)                     | 80.3 (17.6)        | 80.3 (17.6)           |
| Vitality                           | 63.6 (18.5)           | 64.3 (18.0)        | 64.9 (17.9)                     | 64.5 (18.1)        | 64.3 (18.4)           |
| Social functioning                 | 88.7 (18.7)           | 89.6 (18.0)        | 90.1 (17.7)                     | 89.8 (17.9)        | 89.1 (18.5)           |
| Mental role limitations            | 83.8 (29.3)           | 84.2 (28.9)        | 85.0 (28.1)                     | 84.6 (28.6)        | 84.1 (28.6)           |
| Mental health                      | 76.8 (14.3)           | 77.1 (14.1)        | 77.5 (13.9)                     | 77.2 (14.1)        | 77.0 (14.3)           |
| <b>Nurses' Health Study II</b>     |                       |                    |                                 |                    |                       |
| <i>n</i>                           | 4,194                 | 15,307             | 15,906                          | 13,141             | 3,236                 |
| hPDI score                         |                       |                    |                                 |                    |                       |
| Baseline                           | 61.6 (6.6)            | 57.4 (6.9)         | 54.7 (7.0)                      | 52.3 (6.8)         | 49.3 (6.5)            |
| Change                             | -12.5 (2.3)           | -5.5 (1.9)         | -0.1 (1.4)                      | 5.3 (1.9)          | 12.5 (2.3)            |
| Age (year) <sup>†</sup>            | 39 (4)                | 39 (5)             | 39 (5)                          | 39 (5)             | 38 (5)                |
| Body-mass index                    | 26.0 (6.0)            | 25.3 (5.7)         | 24.9 (5.5)                      | 24.7 (5.4)         | 25.1 (5.7)            |
| Physical activity (Met-hours/week) | 21.4 (26.7)           | 20.5 (26.4)        | 20.2 (26.1)                     | 20.1 (25.7)        | 20.0 (26.7)           |
| Alcohol intake (g/day)             | 2.9 (6.0)             | 3.1 (6.0)          | 3.2 (6.3)                       | 3.3 (6.4)          | 3.1 (5.9)             |
| Margarine Intake (servings/day)    | 0.6 (0.8)             | 0.7 (0.8)          | 0.7 (0.8)                       | 0.7 (0.8)          | 0.7 (0.8)             |
| Energy Intake (kcal/day)           | 1625 (490)            | 1737 (528)         | 1796 (538)                      | 1864 (545)         | 1935 (523)            |
| White race (%)                     | 97                    | 97                 | 97                              | 97                 | 97                    |
| Current Smoker (%)                 | 10                    | 9                  | 10                              | 11                 | 10                    |
| Premenopausal (%)                  | 93                    | 94                 | 94                              | 94                 | 94                    |
| Postmenopausal hormone use (%)     | 5                     | 4                  | 4                               | 4                  | 4                     |
| Comorbidities (%)                  |                       |                    |                                 |                    |                       |
| Cardiovascular disease             | 4                     | 3                  | 3                               | 4                  | 3                     |
| Cancer                             | 2                     | 2                  | 2                               | 2                  | 2                     |
| Diabetes                           | 1                     | 1                  | 1                               | 1                  | 2                     |
| Hypertension                       | 8                     | 8                  | 7                               | 7                  | 8                     |
| Hypercholesterolemia               | 20                    | 19                 | 18                              | 18                 | 18                    |
| Respiratory diseases               | 10                    | 10                 | 10                              | 10                 | 9                     |
| NSAIDs use (%)                     | 11                    | 10                 | 10                              | 10                 | 10                    |
| Multivitamin use (%)               | 43                    | 43                 | 43                              | 43                 | 43                    |
| Social status (%)                  |                       |                    |                                 |                    |                       |
| Currently married                  | 82                    | 85                 | 85                              | 84                 | 81                    |
| Currently working                  | 95                    | 96                 | 95                              | 96                 | 95                    |

Supplementary data

|                                                  | Decrease ≥ 10 pt | Decrease 3 to 9 pt | Relatively stable (± 2 pt) | Increase 3 to 9 pt | Increase ≥ 10 pt |
|--------------------------------------------------|------------------|--------------------|----------------------------|--------------------|------------------|
| Husband Education (college)                      | 70               | 71                 | 71                         | 71                 | 69               |
| Income status (%)                                |                  |                    |                            |                    |                  |
| less than \$50,000                               | 15               | 14                 | 13                         | 13                 | 13               |
| \$50,000 to less than \$75,000                   | 24               | 24                 | 23                         | 23                 | 25               |
| \$75,000 to less than \$100,000                  | 18               | 18                 | 18                         | 19                 | 17               |
| \$100,000 or more                                | 31               | 29                 | 30                         | 31                 | 31               |
| Baseline SF-36 scores                            |                  |                    |                            |                    |                  |
| Physical component score                         | 52.6 (8.3)       | 53.1 (7.6)         | 53.3 (7.6)                 | 53.3 (7.7)         | 53.4 (7.7)       |
| Mental component score                           | 47.6 (9.6)       | 48.0 (9.3)         | 48.2 (9.1)                 | 48.1 (9.4)         | 48.0 (9.3)       |
| Physical functioning                             | 90.9 (14.9)      | 91.9 (13.6)        | 92.1 (13.5)                | 92.2 (13.4)        | 91.8 (14.0)      |
| Physical role limitations                        | 81.9 (31.4)      | 83.3 (30.2)        | 83.9 (29.7)                | 83.8 (29.9)        | 84.3 (29.6)      |
| Bodily pain                                      | 76.3 (19.5)      | 77.2 (18.5)        | 77.8 (18.4)                | 77.8 (18.8)        | 78.0 (18.7)      |
| General health                                   | 79.5 (17.9)      | 80.5 (17.0)        | 80.7 (16.8)                | 80.6 (17.1)        | 80.9 (17.3)      |
| Vitality                                         | 54.3 (19.3)      | 55.4 (19.1)        | 56.0 (18.9)                | 56.2 (19.2)        | 56.2 (20.0)      |
| Social functioning                               | 85.0 (20.6)      | 86.6 (19.2)        | 87.1 (18.8)                | 86.6 (19.4)        | 86.6 (19.0)      |
| Mental role limitations                          | 81.1 (30.9)      | 81.8 (30.1)        | 81.9 (30.2)                | 81.8 (30.5)        | 81.7 (30.5)      |
| Mental health                                    | 71.2 (15.4)      | 71.7 (15.0)        | 72.1 (14.7)                | 72.0 (15.1)        | 71.9 (14.9)      |
| <b>Unhealthful plant-based diet index (uPDI)</b> |                  |                    |                            |                    |                  |
| <b>Nurses' Health Study</b>                      |                  |                    |                            |                    |                  |
| <i>n</i>                                         | 2,871            | 12,792             | 15,411                     | 14,951             | 4,265            |
| uPDI score                                       |                  |                    |                            |                    |                  |
| Baseline                                         | 60.2 (6.3)       | 57.0 (6.8)         | 54.6 (6.9)                 | 52.0 (6.8)         | 48.1 (6.5)       |
| Change                                           | -12.2 (2.0)      | -5.4 (1.9)         | 0.0 (1.4)                  | 5.5 (1.9)          | 12.6 (2.5)       |
| Age (year) <sup>†</sup>                          | 58 (7)           | 58 (7)             | 58 (7)                     | 58 (7)             | 58 (7)           |
| Body-mass index                                  | 26.2 (5.1)       | 25.8 (4.9)         | 25.8 (4.9)                 | 26.0 (4.8)         | 26.6 (5.1)       |
| Physical activity (Met-hours/week)               | 20.1 (25.0)      | 20.0 (23.4)        | 19.8 (22.9)                | 19.7 (22.8)        | 19.4 (21.1)      |
| Alcohol intake (g/day)                           | 5.4 (9.6)        | 5.6 (9.7)          | 5.4 (9.8)                  | 4.9 (9.2)          | 4.1 (8.2)        |
| Margarine Intake (servings/day)                  | 0.9 (1.0)        | 0.9 (1.0)          | 0.9 (1.0)                  | 0.9 (1.0)          | 0.9 (1.0)        |
| Energy Intake (kcal/day)                         | 1622 (479)       | 1704 (495)         | 1750 (511)                 | 1799 (508)         | 1844 (500)       |
| White race (%)                                   | 98               | 98                 | 98                         | 98                 | 98               |
| Current Smoker (%)                               | 13               | 13                 | 13                         | 12                 | 11               |
| Premenopausal (%)                                | 22               | 22                 | 22                         | 22                 | 21               |
| Postmenopausal hormone use (%)                   | 32               | 32                 | 31                         | 32                 | 32               |
| Comorbidities (%)                                |                  |                    |                            |                    |                  |
| Cardiovascular disease                           | 9                | 8                  | 8                          | 8                  | 9                |

## Supplementary data

|                                       | Decrease $\geq$ 10 pt | Decrease 3 to 9 pt | Relatively stable ( $\pm$ 2 pt) | Increase 3 to 9 pt | Increase $\geq$ 10 pt |
|---------------------------------------|-----------------------|--------------------|---------------------------------|--------------------|-----------------------|
| Cancer                                | 9                     | 9                  | 9                               | 10                 | 9                     |
| Diabetes                              | 6                     | 5                  | 4                               | 4                  | 4                     |
| Hypertension                          | 34                    | 32                 | 32                              | 33                 | 34                    |
| Hypercholesterolemia                  | 48                    | 46                 | 45                              | 46                 | 48                    |
| Respiratory diseases                  | 12                    | 12                 | 11                              | 11                 | 11                    |
| NSAIDs use (%)                        | 49                    | 50                 | 50                              | 49                 | 48                    |
| Multivitamin use (%)                  | 44                    | 43                 | 42                              | 43                 | 44                    |
| Social status (%)                     |                       |                    |                                 |                    |                       |
| Currently married                     | 82                    | 83                 | 84                              | 83                 | 82                    |
| Currently working                     | 90                    | 90                 | 90                              | 90                 | 89                    |
| Education (more than Bachelor)        | 31                    | 31                 | 31                              | 30                 | 30                    |
| Husband Education (more than college) | 45                    | 48                 | 47                              | 46                 | 45                    |
| Baseline SF-36 scores                 |                       |                    |                                 |                    |                       |
| Physical component score              | 49.9 (9.2)            | 50.2 (8.9)         | 50.3 (8.6)                      | 50.2 (8.8)         | 49.8 (9.0)            |
| Mental component score                | 51.9 (8.6)            | 52.2 (8.4)         | 52.2 (8.4)                      | 52.2 (8.4)         | 51.9 (8.7)            |
| Physical functioning                  | 85.4 (18.2)           | 86.2 (17.3)        | 86.7 (16.7)                     | 86.4 (17.2)        | 85.3 (17.8)           |
| Physical role limitations             | 75.7 (35.6)           | 76.5 (35.0)        | 76.6 (35.0)                     | 76.5 (34.9)        | 75.6 (35.4)           |
| Bodily pain                           | 74.1 (20.6)           | 74.6 (20.1)        | 74.7 (19.9)                     | 74.4 (20.0)        | 73.4 (20.5)           |
| General health                        | 79.4 (18.3)           | 80.0 (17.6)        | 80.4 (17.2)                     | 80.4 (17.4)        | 80.0 (17.5)           |
| Vitality                              | 64.2 (18.1)           | 64.7 (18.0)        | 64.7 (18.0)                     | 64.4 (18.0)        | 63.3 (18.7)           |
| Social functioning                    | 89.1 (18.4)           | 89.7 (17.9)        | 89.9 (17.9)                     | 90.0 (17.8)        | 89.0 (18.7)           |
| Mental role limitations               | 83.6 (29.7)           | 84.6 (28.5)        | 84.8 (28.3)                     | 84.7 (28.5)        | 83.5 (29.5)           |
| Mental health                         | 76.7 (14.3)           | 77.2 (14.0)        | 77.3 (14.1)                     | 77.4 (13.9)        | 76.9 (14.4)           |
| <b>Nurses' Health Study II</b>        |                       |                    |                                 |                    |                       |
| <i>n</i>                              | 3,013                 | 12,392             | 15,244                          | 15,833             | 5,302                 |
| uPDI score                            |                       |                    |                                 |                    |                       |
| Baseline                              | 60.9 (6.4)            | 57.9 (7.1)         | 55.5 (7.2)                      | 52.6 (7.1)         | 48.9 (6.5)            |
| Change                                | -12.4 (2.3)           | -5.4 (1.9)         | 0.0 (1.4)                       | 5.5 (1.9)          | 12.9 (2.7)            |
| Age (year) <sup>†</sup>               | 38 (5)                | 38 (5)             | 39 (5)                          | 39 (4)             | 39 (4)                |
| Body-mass index                       | 25.0 (5.6)            | 24.9 (5.5)         | 24.9 (5.6)                      | 25.1 (5.5)         | 25.9 (5.9)            |
| Physical activity (Met-hours/week)    | 18.4 (21.8)           | 19.9 (26.7)        | 19.9 (24.7)                     | 21.0 (27.0)        | 22.3 (28.7)           |
| Alcohol intake (g/day)                | 3.3 (6.6)             | 3.3 (6.3)          | 3.2 (6.2)                       | 3.1 (6.0)          | 2.9 (6.0)             |
| Margarine Intake (servings/day)       | 0.7 (0.8)             | 0.7 (0.8)          | 0.7 (0.8)                       | 0.7 (0.8)          | 0.7 (0.8)             |
| Energy Intake (kcal/day)              | 1651 (501)            | 1739 (530)         | 1781 (542)                      | 1833 (540)         | 1893 (530)            |
| White race (%)                        | 96                    | 97                 | 97                              | 97                 | 97                    |

Supplementary data

|                                       | Decrease ≥ 10 pt | Decrease 3 to 9 pt | Relatively stable (± 2 pt) | Increase 3 to 9 pt | Increase ≥ 10 pt |
|---------------------------------------|------------------|--------------------|----------------------------|--------------------|------------------|
| Current Smoker (%)                    | 10               | 11                 | 10                         | 10                 | 8                |
| Premenopausal (%)                     | 93               | 94                 | 94                         | 94                 | 94               |
| Postmenopausal hormone use (%)        | 5                | 4                  | 4                          | 4                  | 4                |
| Comorbidities (%)                     |                  |                    |                            |                    |                  |
| Cardiovascular disease                | 4                | 3                  | 3                          | 3                  | 4                |
| Cancer                                | 2                | 2                  | 2                          | 2                  | 1                |
| Diabetes                              | 1                | 1                  | 1                          | 1                  | 1                |
| Hypertension                          | 8                | 8                  | 7                          | 8                  | 8                |
| Hypercholesterolemia                  | 20               | 19                 | 18                         | 18                 | 19               |
| Respiratory diseases                  | 11               | 10                 | 9                          | 9                  | 10               |
| NSAIDs use (%)                        | 11               | 11                 | 10                         | 10                 | 9                |
| Multivitamin use (%)                  | 45               | 44                 | 42                         | 43                 | 41               |
| Social status (%)                     |                  |                    |                            |                    |                  |
| Currently married                     | 81               | 84                 | 85                         | 85                 | 85               |
| Currently working                     | 95               | 95                 | 96                         | 95                 | 96               |
| Husband Education (more than college) | 71               | 71                 | 71                         | 71                 | 70               |
| Income status (%)                     |                  |                    |                            |                    |                  |
| less than \$50,000                    | 14               | 13                 | 14                         | 13                 | 14               |
| \$50,000 to less than \$75,000        | 23               | 23                 | 23                         | 23                 | 24               |
| \$75,000 to less than \$100,000       | 18               | 18                 | 18                         | 18                 | 18               |
| \$100,000 or more                     | 30               | 30                 | 30                         | 30                 | 30               |
| Baseline SF-36 scores                 |                  |                    |                            |                    |                  |
| Physical component score              | 52.8 (8.1)       | 53.1 (7.8)         | 53.2 (7.5)                 | 53.2 (7.7)         | 53.2 (7.9)       |
| Mental component score                | 47.7 (9.6)       | 48.1 (9.2)         | 48.2 (9.2)                 | 48.0 (9.3)         | 47.7 (9.6)       |
| Physical functioning                  | 91.0 (15.2)      | 91.9 (13.7)        | 92.2 (13.2)                | 92.0 (13.6)        | 91.6 (13.9)      |
| Physical role limitations             | 82.1 (31.1)      | 83.6 (30.1)        | 83.7 (29.9)                | 83.7 (29.9)        | 83.5 (30.0)      |
| Bodily pain                           | 76.9 (19.0)      | 77.4 (18.8)        | 77.7 (18.5)                | 77.6 (18.5)        | 77.4 (18.7)      |
| General health                        | 79.8 (17.7)      | 80.3 (17.3)        | 80.7 (16.9)                | 80.6 (16.9)        | 80.8 (17.2)      |
| Vitality                              | 55.4 (19.3)      | 55.9 (19.2)        | 55.9 (19.1)                | 55.6 (19.1)        | 55.2 (19.2)      |
| Social functioning                    | 85.6 (20.1)      | 86.7 (19.2)        | 86.9 (19.0)                | 86.7 (19.2)        | 86.1 (19.5)      |
| Mental role limitations               | 79.7 (31.9)      | 81.9 (30.2)        | 82.2 (30.2)                | 81.9 (30.1)        | 81.2 (30.8)      |
| Mental health                         | 71.6 (15.3)      | 72.0 (14.8)        | 72.1 (14.9)                | 71.8 (15.0)        | 71.4 (15.3)      |

NHS, Nurses' Health Study; NHS II, Nurses' Health Study II; hPDI, healthful plant-based diet index; SF-36, 36-Item Short Form Health Survey; uPDI, unhealthful plant-based index.

\* Values were means (SDs) or percentages and were standardized to the age distribution of the study population. † Value was not age-adjusted.

## Supplementary data

**Supplementary Table S2. 4-year changes in physical component scores (1992-2000 in NHS and 1993-2001 in NHSII) according to 4-year changes in plant-based diet indices (1990-1998 in NHS and 1991-1999 in NHSII) adjusted for age, baseline corresponding plant-based diet indices, and baseline corresponding HRQoL scores\***

|                                                | Decrease $\geq$ 10 pt | Decrease 3 to 9 pt   | Relatively<br>stable ( $\pm$ 2 pt) | Increase 3 to 9 pt   | Increase $\geq$ 10 pt | Changes/10-point<br>increase in indices<br>(95% CIs) | <i>p</i> |
|------------------------------------------------|-----------------------|----------------------|------------------------------------|----------------------|-----------------------|------------------------------------------------------|----------|
| <b>Overall Plant-Based Diet Index (PDI)</b>    |                       |                      |                                    |                      |                       |                                                      |          |
| <b>Nurses' Health study</b>                    |                       |                      |                                    |                      |                       |                                                      |          |
| Basic model                                    | -0.45 (-0.65, -0.25)  | -0.22 (-0.34, -0.10) | 0.00                               | 0.08 (-0.04, 0.20)   | 0.23 (0.02, 0.44)     | 0.29 (0.20, 0.37)                                    | <0.001   |
| <b>Nurses' Health study II</b>                 |                       |                      |                                    |                      |                       |                                                      |          |
| Basic model                                    | -0.22 (-0.39, -0.04)  | -0.09 (-0.20, 0.02)  | 0.00                               | 0.01 (-0.10, 0.12)   | -0.06 (-0.24, 0.12)   | 0.09 (0.02, 0.16)                                    | 0.02     |
| <b>Pooled Results</b>                          |                       |                      |                                    |                      |                       |                                                      |          |
| Basic model                                    | -0.32 (-0.45, -0.19)  | -0.15 (-0.23, -0.07) | 0.00                               | 0.04 (-0.04, 0.12)   | 0.06 (-0.08, 0.20)    | 0.17 (0.12, 0.23)                                    | <0.001   |
| <b>Healthful Plant-Based Diet Index (hPDI)</b> |                       |                      |                                    |                      |                       |                                                      |          |
| <b>Nurses' Health study</b>                    |                       |                      |                                    |                      |                       |                                                      |          |
| Basic model                                    | -0.72 (-0.91, -0.53)  | -0.24 (-0.36, -0.13) | 0.00                               | 0.12 (0.00, 0.25)    | 0.23 (0.02, 0.44)     | 0.39 (0.30, 0.47)                                    | <0.001   |
| <b>Nurses' Health study II</b>                 |                       |                      |                                    |                      |                       |                                                      |          |
| Basic model                                    | -0.63 (-0.81, -0.46)  | -0.21 (-0.31, -0.10) | 0.00                               | 0.09 (-0.02, 0.20)   | 0.01 (-0.16, 0.19)    | 0.29 (0.22, 0.37)                                    | <0.001   |
| <b>Pooled Results</b>                          |                       |                      |                                    |                      |                       |                                                      |          |
| Basic model                                    | -0.67 (-0.80, -0.55)  | -0.22 (-0.30, -0.15) | 0.00                               | 0.11 (0.03, 0.19)    | 0.10 (-0.03, 0.24)    | 0.33 (0.28, 0.39)                                    | <0.001   |
| <b>Unhealthy Plant-Based Diet Index (uPDI)</b> |                       |                      |                                    |                      |                       |                                                      |          |
| <b>Nurses' Health study</b>                    |                       |                      |                                    |                      |                       |                                                      |          |
| Basic model                                    | 0.19 (0.00, 0.38)     | 0.03 (-0.09, 0.15)   | 0.00                               | -0.33 (-0.45, -0.21) | -0.73 (-0.92, -0.55)  | -0.36 (-0.44, -0.29)                                 | <0.001   |
| <b>Nurses' Health study II</b>                 |                       |                      |                                    |                      |                       |                                                      |          |

Supplementary data

|             |                      |                     |      |                     |                      |                    |      |
|-------------|----------------------|---------------------|------|---------------------|----------------------|--------------------|------|
| Basic model | -0.24 (-0.41, -0.08) | -0.08 (-0.19, 0.03) | 0.00 | -0.03 (-0.14, 0.08) | -0.22 (-0.39, -0.06) | 0.01 (-0.06, 0.08) | 0.78 |
|-------------|----------------------|---------------------|------|---------------------|----------------------|--------------------|------|

**Pooled Results**

|             |                     |                     |      |                      |                      |                      |        |
|-------------|---------------------|---------------------|------|----------------------|----------------------|----------------------|--------|
| Basic model | -0.06 (-0.19, 0.06) | -0.03 (-0.11, 0.05) | 0.00 | -0.17 (-0.25, -0.09) | -0.45 (-0.57, -0.33) | -0.15 (-0.20, -0.10) | <0.001 |
|-------------|---------------------|---------------------|------|----------------------|----------------------|----------------------|--------|

NHS, Nurses' Health Study; NHS II, Nurses' Health Study II.

\* Values were beta coefficients (95% CIs) in physical component scores. Pooled results were calculated with a fixed effects model.

† The *P* value for Q-statistic for heterogeneity <0.05, indicating statistically significant heterogeneity between the NHS and the NHSII.

## Supplementary data

**Supplementary Table S3. 4-year changes in mental component scores (1992-2000 in NHS and 1993-2001 in NHSII) according to 4-year changes in plant-based diet indices (1990-1998 in NHS and 1991-1999 in NHSII) adjusted for age, baseline corresponding plant-based diet indices, and baseline corresponding HRQoL scores\***

|                                                  | Decrease $\geq$ 10 pt | Decrease 3 to 9 pt  | Relatively stable ( $\pm$ 2 pt) | Increase 3 to 9 pt | Increase $\geq$ 10 pt | Changes/10-point increase in indices (95% CIs) | <i>p</i> |
|--------------------------------------------------|-----------------------|---------------------|---------------------------------|--------------------|-----------------------|------------------------------------------------|----------|
| <b>Overall Plant-Based Diet Index (PDI)</b>      |                       |                     |                                 |                    |                       |                                                |          |
| <b>Nurses' Health study</b>                      |                       |                     |                                 |                    |                       |                                                |          |
| Basic model                                      | -0.10 (-0.28, 0.07)   | 0.02 (-0.09, 0.12)  | 0.00                            | 0.16 (0.06, 0.26)  | -0.01 (-0.20, 0.17)   | 0.06 (-0.01, 0.14)                             | 0.10     |
| <b>Nurses' Health study II</b>                   |                       |                     |                                 |                    |                       |                                                |          |
| Basic model                                      | -0.36 (-0.57, -0.16)  | -0.10 (-0.22, 0.03) | 0.00                            | 0.09 (-0.04, 0.21) | 0.16 (-0.04, 0.37)    | 0.21 (0.12, 0.29)                              | <0.001   |
| <b>Pooled Results</b>                            |                       |                     |                                 |                    |                       |                                                |          |
| Basic model                                      | -0.21 (-0.35, -0.08)  | -0.03 (-0.11, 0.05) | 0.00                            | 0.13 (0.05, 0.21)  | 0.06 (-0.07, 0.20)    | 0.12 (0.07, 0.18)                              | <0.001   |
| <b>Healthful Plant-Based Diet Index (hPDI)</b>   |                       |                     |                                 |                    |                       |                                                |          |
| <b>Nurses' Health study</b>                      |                       |                     |                                 |                    |                       |                                                |          |
| Basic model                                      | -0.15 (-0.32, 0.01)   | 0.02 (-0.09, 0.12)  | 0.00                            | 0.15 (0.05, 0.26)  | 0.15 (-0.04, 0.33)    | 0.10 (0.03, 0.17)                              | 0.007    |
| <b>Nurses' Health study II</b>                   |                       |                     |                                 |                    |                       |                                                |          |
| Basic model                                      | -0.49 (-0.69, -0.29)  | -0.08 (-0.20, 0.05) | 0.00                            | 0.17 (0.04, 0.29)  | 0.23 (0.03, 0.43)     | 0.27 (0.18, 0.35)                              | <0.001   |
| <b>Pooled Results</b>                            |                       |                     |                                 |                    |                       |                                                |          |
| Basic model                                      | -0.29 (-0.42, -0.16)  | -0.02 (-0.10, 0.06) | 0.00                            | 0.16 (0.08, 0.24)  | 0.19 (0.05, 0.32)     | 0.17 (0.11, 0.22)                              | <0.001   |
| <b>Unhealthful Plant-Based Diet Index (uPDI)</b> |                       |                     |                                 |                    |                       |                                                |          |
| <b>Nurses' Health study</b>                      |                       |                     |                                 |                    |                       |                                                |          |
| Basic model                                      | 0.17 (0.00, 0.34)     | 0.12 (0.02, 0.23)   | 0.00                            | 0.03 (-0.07, 0.14) | -0.21 (-0.37, -0.05)  | -0.13 (-0.20, -0.07)                           | <0.001   |



Supplementary data

**Nurses' Health study II**

|             |                   |                   |      |                    |                     |                      |        |
|-------------|-------------------|-------------------|------|--------------------|---------------------|----------------------|--------|
| Basic model | 0.28 (0.09, 0.47) | 0.19 (0.06, 0.32) | 0.00 | 0.06 (-0.07, 0.18) | -0.15 (-0.34, 0.04) | -0.16 (-0.23, -0.08) | <0.001 |
|-------------|-------------------|-------------------|------|--------------------|---------------------|----------------------|--------|

**Pooled Results**

|             |                   |                   |      |                    |                      |                      |        |
|-------------|-------------------|-------------------|------|--------------------|----------------------|----------------------|--------|
| Basic model | 0.22 (0.09, 0.34) | 0.15 (0.07, 0.23) | 0.00 | 0.04 (-0.04, 0.12) | -0.19 (-0.31, -0.07) | -0.14 (-0.19, -0.09) | <0.001 |
|-------------|-------------------|-------------------|------|--------------------|----------------------|----------------------|--------|

NHS, Nurses' Health Study; NHS II, Nurses' Health Study II.

\* Values were beta coefficients (95% CIs) in mental component scores. Pooled results were calculated with a fixed effects model.

† The *P* value for Q-statistic for heterogeneity <0.05, indicating statistically significant heterogeneity between the NHS and the NHSII.

## Supplementary data

**Supplementary Table S4. Changes in physical and mental component scores per 10-point increase in hPDI, 5-lbs increase in weight, and 5-Met-hours/week increase in physical activity**

|                                                  | PCS                  | <i>P</i> | MCS                  | <i>P</i> |
|--------------------------------------------------|----------------------|----------|----------------------|----------|
| <b>NHS</b>                                       |                      |          |                      |          |
| <b>hPDI increase (10 pt)</b>                     |                      |          |                      |          |
| Multivariable-adjusted model                     | 0.22 (0.14, 0.30)    | <0.001   | 0.04 (-0.04, 0.11)   | 0.34     |
| <b>Weight increase (5 lbs)</b>                   |                      |          |                      |          |
| Multivariable-adjusted model                     | -0.29 (-0.31, -0.26) | <0.001   | 0.09 (0.07, 0.11)    | <0.001   |
| <b>Physical activity increase (5 Met-h/week)</b> |                      |          |                      |          |
| Multivariable-adjusted model                     | 0.19 (0.18, 0.20)    | <0.001   | 0.10 (0.08, 0.11)    | <0.001   |
| <b>NHSII</b>                                     |                      |          |                      |          |
| <b>hPDI increase (10 pt)</b>                     |                      |          |                      |          |
| Multivariable-adjusted model                     | 0.07 (-0.01, 0.14)   | 0.08     | 0.16 (0.07, 0.25)    | <0.001   |
| <b>Weight increase (5 lbs)</b>                   |                      |          |                      |          |
| Multivariable-adjusted model                     | -0.35 (-0.37, -0.34) | <0.001   | -0.03 (-0.05, -0.01) | 0.001    |
| <b>Physical activity increase (5 Met-h/week)</b> |                      |          |                      |          |
| Multivariable-adjusted model                     | 0.06 (0.05, 0.07)    | <0.001   | 0.08 (0.07, 0.09)    | <0.001   |

hPDI, healthful plant-based diet index; PCS, physical component scores; MCS, mental component scores; NHS, Nurses' Health Study; NHS II, Nurses' Health Study II. Values were multivariable-adjusted beta coefficients (95% CIs) in PCS and MCS. Results were calculated in each cohort and pooled with a fixed effects model.

Supplementary data

**Nurses' Health Study (NHS), N= 50,290**

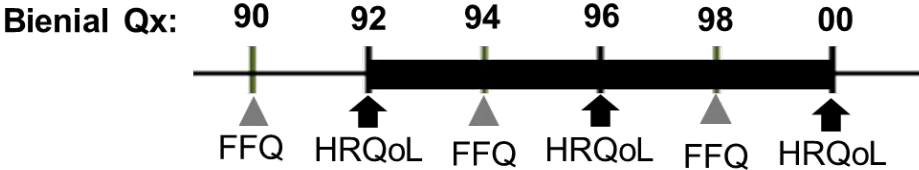

**Nurses' Health Study II (NHSII), N= 51,784**

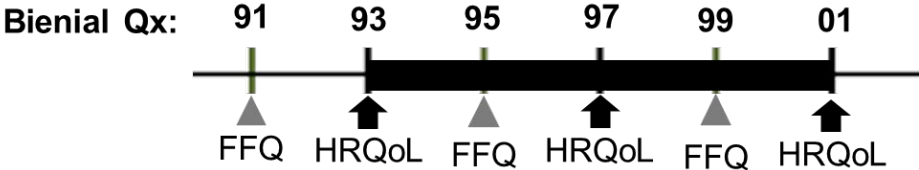

**Supplementary Figure S1: Assessments of dietary information and HRQoL during the follow-up periods.** The black bold lines show the follow-up periods. Qx, questionnaire; FFQ, food frequency questionnaire; HRQoL, health-related quality of life.

## Supplementary data

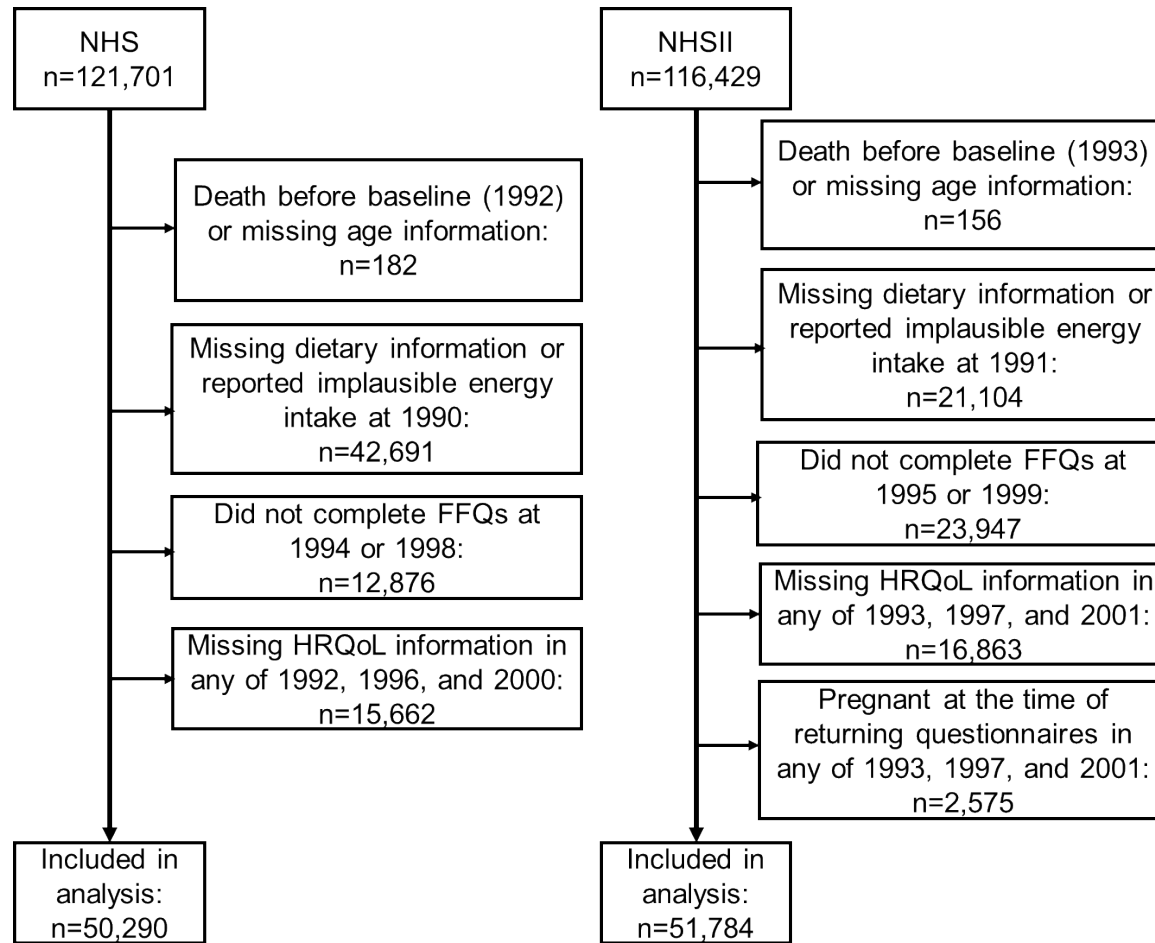

**Supplementary Figure S2: Flow chart of participants.** NHS, Nurses' Health Study; NHS II, Nurses' Health Study II; FFQ, food frequency questionnaire; HRQoL, health-related quality of life.

Supplementary data

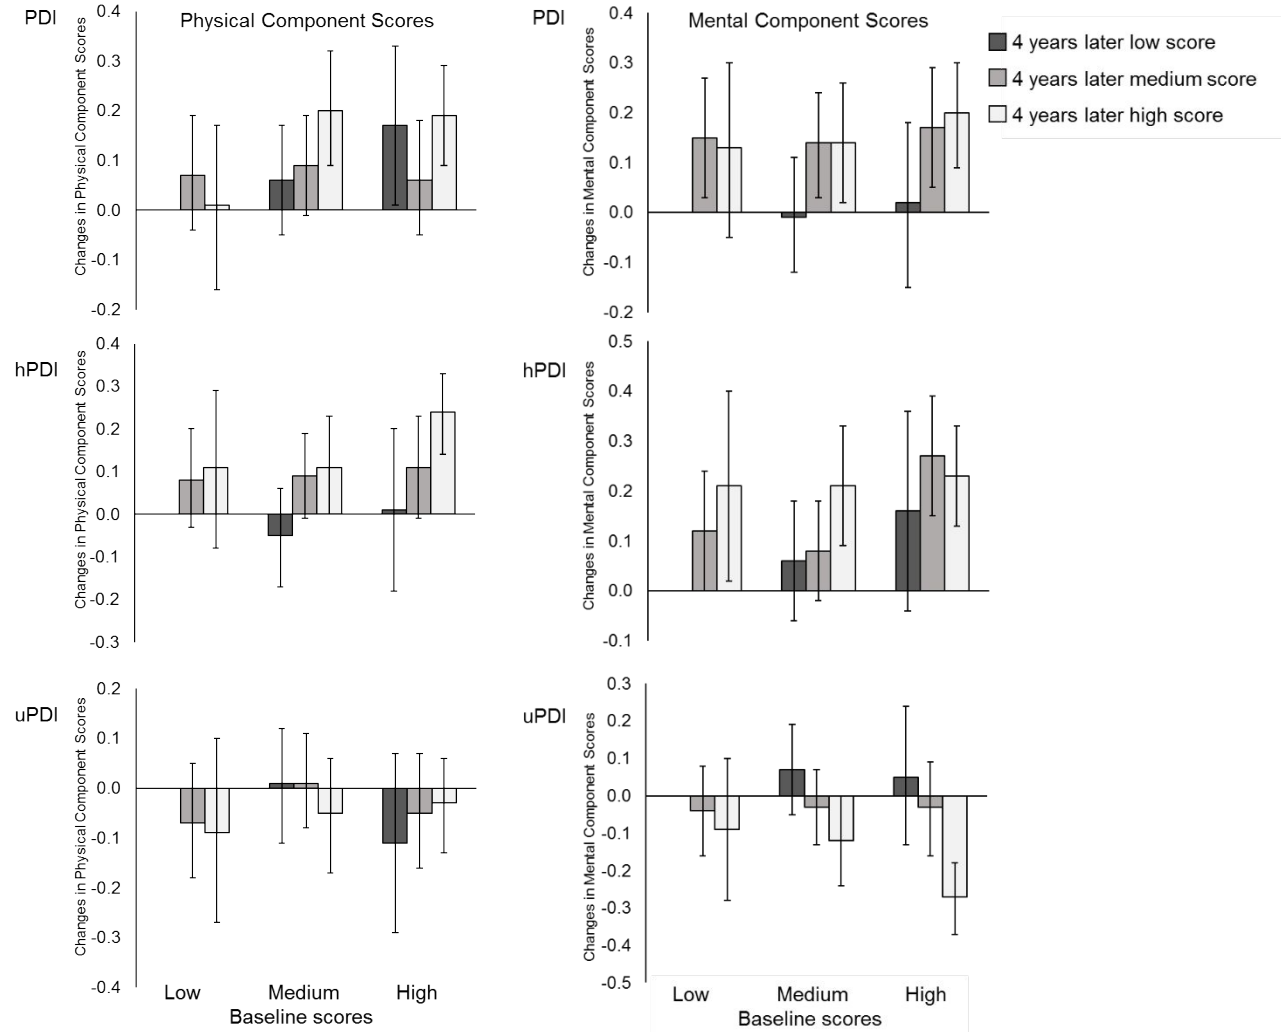

**Supplementary Figure S3. Changes in physical and mental component scores according to baseline and 4-years later plant-based diet index scores.** hPDI, healthful plant-based diet index; PDI, overall plant-based diet index; uPDI, unhealthful plant-based index.

## Supplementary data

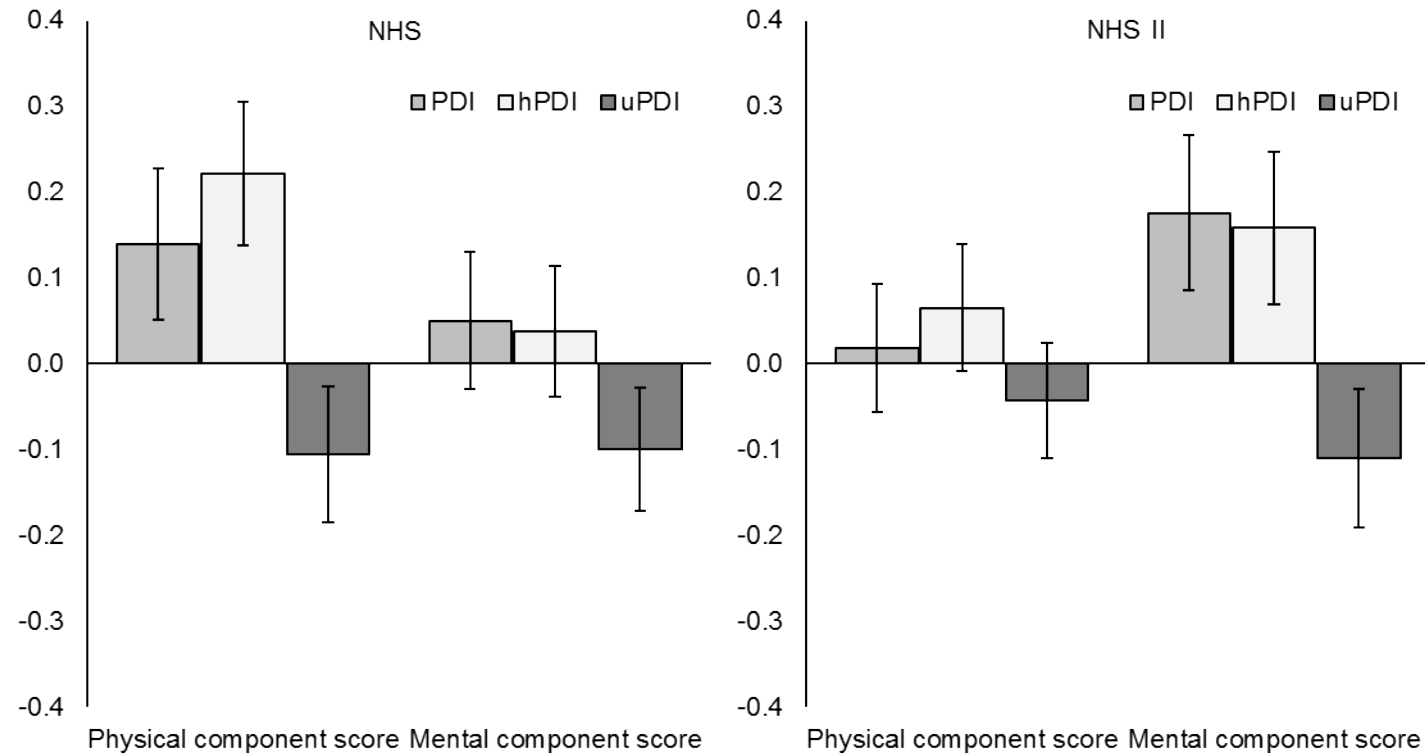

**Supplementary Figure S4. Changes in physical and mental component scores per 10-point increase in plant-based diet index scores in the NHS and the NHSII.** The bar graph indicate the multivariable-adjusted differences of PCS and MCS scores. Error bars indicate 95% confidence intervals. hPDI, healthful plant-based diet index; MCS, mental component score; NHS, Nurses' Health Study; NHSII, Nurses' Health Study II; PCS, physical component score; PDI, overall plant-based diet index; uPDI, unhealthful plant-based index.
